# Supplementary material for: Waves of attention: patterns and themes of international antimicrobial resistance reports, 1945–2020
Source: PubMed Central journal article supplement (PMC8573652; doi:10.1136/bmjgh-2021-006909), 2021-11-05
Supplement: bmjgh-2021-006909supp001.pdf [file bmjgh-2021-006909supp001.pdf]

Supplementary Table One: Coding Categories

| Type of report         | Publisher of report | Orientation    | Target audience    | Target locale | Stage of policy/report | Aim of policy report | Intervention called for |
|------------------------|---------------------|----------------|--------------------|---------------|------------------------|----------------------|-------------------------|
| action plan            | government          | human          | academics          | Africa        | contemplative          | access               | financing               |
| scientific report      | NGO                 | animal         | general population | Americas      | implementation/action  | Conservation         | behaviour change        |
| surveillance report    | private             | plant          | government         | Asia          | maintenance            | containment          | governance              |
| stakeholder engagement |                     | environment    | industry           | Europe        | evaluating             | infection prevention | training + education    |
| legislation            |                     | food           | healthcare sector  | Oceania       | other                  | innovation           | health infrastructure   |
| policy framework       |                     | one health     | farmers/vets       | Global north  |                        | surveillance         | information +research   |
| meeting report         |                     | human & animal | Other              | Global south  |                        | Other                | other                   |
|                        |                     | Agriculture    |                    | World wide    |                        | All of above         |                         |
