# Supplementary material for: Waves of attention: patterns and themes of international antimicrobial resistance reports, 1945–2020
Source: PubMed Central journal article supplement (PMC8573652; doi:10.1136/bmjgh-2021-006909), 2021-11-05
Supplement: bmjgh-2021-006909supp002.pdf [file bmjgh-2021-006909supp002.pdf]

Supplementary Table Two: Coded Reports

| Year | Title of Report                                                                                                                                                                                                                 |
|------|---------------------------------------------------------------------------------------------------------------------------------------------------------------------------------------------------------------------------------|
| 1955 | NAS. <i>Proceedings First International Conference on the Use of Antibiotics in Agriculture</i> (Washington: National Academy of Sciences - National Research Council, 1955).                                                   |
| 1961 | WHO. <i>Standardization of methods for conducting microbic sensitivity tests: second report of the Expert Committee on Antibiotics [meeting held in Geneva from 11 to 16 July 1960]</i> (Geneva: WHO, 1961).                    |
| 1963 | WHO. <i>The Public Health Aspects of the Use of Antibiotics in Food and Feedstuffs, World Health Organization</i> [Technical Report Series 260] (Geneva: WHO, 1963).                                                            |
| 1969 | NAS/NRC: <i>The use of drugs in animal feeds. Proceedings of a symposium 1969</i> (Washington: NAS/NRC, 1969).                                                                                                                  |
| 1970 | EEC. Council Directive 70/524/EEC concerning additives in feedingstuffs. <i>Official Journal of the European Union</i> . L 270, 14 December 1970, pp. 1-17.                                                                     |
| 1971 | Ericsson, Hans M., and John C. Sherris. Antibiotic Sensitivity Testing. Report of an International Collaborative Study. Vol. Suppl. 217, <i>Acta Pathologica et Microbiologica Scandinavica</i> . Copenhagen: Munksgaard, 1971. |
| 1974 | WHO. <i>The Public Health Aspects of Antibiotics in Foodstuffs. Report on a Working Group, Bremen (1-5 October 1973)</i> (Geneva: WHO, 1974).                                                                                   |
| 1976 | WHO. <i>Public Health Aspects of Antibiotic-resistant Bacteria in the environment report on a consultation meeting, Brussels, 9-12 December 1975</i> (Geneva: WHO, 1976).                                                       |
| 1977 | WHO. <i>The Selection of Essential Drugs</i> (Geneva: WHO, 1977).                                                                                                                                                               |
| 1978 | WHO. <i>Surveillance for the prevention and control of health hazards due to antibiotic-resistant enterobacteria: report of a WHO meeting</i> (Geneva: WHO, 1978).                                                              |
| 1981 | WHO. <i>Antimicrobial resistance report of scientific working group Geneva, 23-27, Nov</i> (Geneva: WHO, 1981).                                                                                                                 |
| 1981 | Levy, S., Clowes, R. and Koenig, E. (conveners). <i>Statement Regarding Worldwide Antibiotic Misuse. Molecular Biology, Pathogenicity, and Ecology of Bacterial Plasmids Conference</i> (Santo Domingo, 1981)                   |
| 1982 | WHO. <i>Surveillance of antimicrobial resistance report of a consultation</i> (Geneva: WHO, 1982).                                                                                                                              |
| 1983 | WHO. <i>Control of antibiotic-resistant bacteria: Memorandum from a WHO Meeting</i> (Geneva: WHO, 1983).                                                                                                                        |
| 1985 | Burke, John P, Summary report of worldwide antibiotic resistance: international task forces on antibiotic use, <i>Reviews of Infectious Diseases</i> 7/4 (1985).                                                                |
| 1994 | WHO. <i>WHO scientific working group on monitoring and management of bacterial resistance to antimicrobial agents</i> (Geneva: WHO, 1994).                                                                                      |
| 1997 | WHO. <i>The Medical Impact of Antimicrobial Use in Food Animals. Report of a WHO Meeting. Berlin, Germany, 13-17 October 1997</i> (Geneva: WHO, 1997).                                                                          |
| 1998 | <i>Report from the Invitational European Union Conference: 'The Microbial Threat: The Copenhagen Recommendation</i> (Copenhagen: Danish Ministry of Health and Ministry of Food Agriculture and Fisheries, September 1998).     |

|      |                                                                                                                                                                                                                                                                                                                                             |
|------|---------------------------------------------------------------------------------------------------------------------------------------------------------------------------------------------------------------------------------------------------------------------------------------------------------------------------------------------|
| 1998 | WHO. <i>World Health Assembly (51st), Emerging and other communicable diseases: antimicrobial resistance. WHA51.17, 1998, agenda item 21.3.</i> (Geneva: WHO, 1998).                                                                                                                                                                        |
| 1998 | WHO. <i>Use of Quinolones in Food Animals and Potential Impact on Human Health. Report of a WHO Meeting, Geneva, Switzerland, 2-5 June 1998</i> (Geneva: WHO, 1998).                                                                                                                                                                        |
| 1998 | WHO. <i>Antimicrobial Resistance Monitoring: Information Exchange and Opportunities for Collaboration. Report of the Second Joint Who/Ifpma Meeting, Geneva 2-3 April 1998</i> (Geneva: WHO, 1998).                                                                                                                                         |
| 1999 | <i>Opinion of the Scientific Steering Committee on antimicrobial resistance. European Commission, Directorate- General XXIV</i> (Brussels: SSC for EC, 1999).                                                                                                                                                                               |
| 1999 | OIE. <i>The use of antibiotics in animals - Ensuring the protection of public health. Summary and Recommendations from the European Scientific Conference 24-26 March, Paris.</i> (Paris: OIE, 1999).                                                                                                                                       |
| 1999 | European Agency for the Evaluation of Medicinal Products, <i>Antibiotic resistance in the European Union associated with therapeutic use of veterinary medicines. Report and qualitative risk assessment. Committee for Veterinary Medicinal Products. July 14</i> (London: EMA, 1999).                                                     |
| 2000 | EMA. <i>A risk management strategic plan for controlling antimicrobial resistance through the authorisation of veterinary medicines. Recommendations consequent to the report and qualitative risk assessment of the CVMP</i> (London: EMA, 2000).                                                                                          |
| 2000 | WHO/ FAO/OIE. <i>WHO Global Principles for the Containment of Antimicrobial Resistance in Animals Intended for Food. Report of a WHO Consultation with the participation of the Food and Agriculture Organization of the United Nations and the Office International des Epizooties. Geneva, Switzerland. June 5-9</i> (WHO: Geneva, 2000). |
| 2001 | WHO. <i>WHO global strategy for containment of antimicrobial resistance</i> (WHO: Geneva, 2001).                                                                                                                                                                                                                                            |
| 2002 | WHO. <i>Monitoring antimicrobial usage in food animals for the protection of human health Report of a WHO consultation Oslo, Norway 10-13 September 2001</i> (Geneva: WHO, 2002).                                                                                                                                                           |
| 2002 | EC, <i>Council recommendation of 15 November 2001 on the prudent use of antimicrobial agents in human medicine</i> (Brussels: European Commission, 2002).                                                                                                                                                                                   |
| 2003 | European Parliament. <i>Regulation (EC) No 1831/2003 of the European Parliament and the Council of 22 September 2003 on additives for use in animal nutrition. Official Journal of the European Union, L268/29, 18.10.2003</i> (Strasbourg: EP, 2003).                                                                                      |
| 2003 | OIE, <i>OIE International Standards on Antimicrobial Resistance. Paris: OIE. Based on 2001 OIE Headquarters meeting Paris</i> (Paris: OIE, 2003).                                                                                                                                                                                           |
| 2003 | FAO/WHO/OIE. <i>Joint FAO/WHO/OIE Expert Workshop on Non-Human Antimicrobial Usage and Antimicrobial Resistance: Scientific Assessment. Geneva, Switzerland, 1-5 December 2003</i> (Geneva: WHO, 2003).                                                                                                                                     |
| 2003 | WHO, <i>Impacts of antimicrobial growth promoter termination in Denmark : the WHO international review panel' s evaluation of the termination of the use of antimicrobial growth promoters in Denmark : Foulum, Denmark 6-9 November 2002</i> (Geneva: WHO, 2003).                                                                          |

|      |                                                                                                                                                                                                                                                                                                                |
|------|----------------------------------------------------------------------------------------------------------------------------------------------------------------------------------------------------------------------------------------------------------------------------------------------------------------|
| 2004 | FAO/WHO/OIE. 2004. <i>Second Joint FAO/WHO/OIE Expert Workshop on Non-Human Antimicrobial Usage and Antimicrobial Resistance: Management Options. Oslo, Norway, 15-18 March 2004</i> (Geneva: WHO, 2004).                                                                                                      |
| 2005 | FAO/WHO/Codex Alimentarius. <i>Code of Practice to minimize and contain antimicrobial resistance</i> (2005).                                                                                                                                                                                                   |
| 2005 | WHO. <i>Critically important antibacterial agents for human medicine for risk management strategies of non-human use. Report of a WHO working group consultation, Canberra, Australia, 15-18 February 2005</i> (Geneva: WHO, 2005).                                                                            |
| 2006 | EMA. <i>CVMP Strategy on Antimicrobials 2006-2010 and status report on activities on antimicrobials</i> (London: EMA, 2006).                                                                                                                                                                                   |
| 2006 | FAO/WHO/OIE. <i>Report of a Joint FAO/WHO/OIE Expert Consultation on Antimicrobial Use in Aquaculture and Antimicrobial Resistance. Seoul, Republic of Korea, 13-16 June 2006</i> (Geneva: WHO, 2006).                                                                                                         |
| 2007 | OIE. <i>OIE list of antimicrobials of veterinary importance. November 2007</i> (Paris: OIE, 2007).                                                                                                                                                                                                             |
| 2007 | WHO. <i>Critically important antimicrobials for human medicine: categorization for the development of risk management strategies to contain antimicrobial resistance due to non-human antimicrobial use. Report of the second WHO Expert Meeting, Copenhagen, Denmark, 29-31 May 2007</i> (Geneva: WHO, 2007). |
| 2007 | EFSA. 'Report of the Task Force of Zoonoses Data Collection including a proposal for harmonized monitoring scheme of antimicrobial resistance in Salmonella in fowl ( <i>Gallus gallus</i> ), turkeys, and pigs and <i>Campylobacter jejuni</i> and <i>C. coli</i> in broilers', <i>EFSA Journal</i> (2007).   |
| 2008 | FAO/WHO/OIE. <i>Joint FAO/WHO/OIE Expert Meeting on Critically Important Antimicrobials. Report of the FAO/WHO/OIE Expert Meeting. FAO, Rome, 26-30 November 2007</i> (Rome: FAO, 2008).                                                                                                                       |
| 2008 | EC, <i>Council Conclusions on Antimicrobial Resistance</i> (Brussels: Council of European Union, 2008).                                                                                                                                                                                                        |
| 2008 | WHO, FAO, OIE, UNICEF, UNSIC, and World Bank. <i>Contributing to One World, One Health – A Strategic Framework for Reducing Risks of Infectious Diseases at the Animal-Human-Ecosystems Interface</i> .                                                                                                        |
| 2009 | EC. <i>Council Conclusions of 1 December 2009 concerning innovative incentives for effective antibiotics</i> (Brussels: European Commission, 2009).                                                                                                                                                            |
| 2009 | ECDC, EMEA. <i>The bacterial challenge: time to react, ECDC/EMEA joint technical report, European Centre for Disease Prevention and Control, Stockholm</i> (Stockholm: ECDC 2009).                                                                                                                             |
| 2009 | ECDC/EFSA/EMA. 'Joint Scientific Report of ECDC, EFSA and EMEA on Methicillin Resistant <i>Staphylococcus aureus</i> (MRSA) in Livestock, Companion Animals and Food', <i>EFSA Journal</i> , 7 (6) (2009).                                                                                                     |
| 2009 | ECDC/EFSA/EMA. 'Joint Opinion on antimicrobial resistance (AMR) focused on zoonotic infections'. <i>EFSA Journal</i> , 7 (2009).                                                                                                                                                                               |
| 2009 | EFSA. <i>Assessment of the Public Health significance of methicillin resistant Staphylococcus aureus (MRSA) in animals and foods Scientific Opinion of the Panel on Biological Hazards(Question No EFSA-Q-2008-300) Adopted on 5 March 2009</i> (Parma: EFSA, 2009).                                           |

|      |                                                                                                                                                                                                                                      |
|------|--------------------------------------------------------------------------------------------------------------------------------------------------------------------------------------------------------------------------------------|
| 2009 | EMA/HMA. <i>Joint Heads of Medicines Agencies (HMA)/EMA Meeting on Promoting Prudent and Responsible Use of Antimicrobials in Veterinary Medicine Marienbad, Czech Republic 19 – 20 May 2009.</i>                                    |
| 2010 | FAO, OIE, WHO. <i>The FAO-OIE-WHO collaboration – tripartite concept note, FAO, OIE and WHO</i> (WHO/OIE/FAO, 2010).                                                                                                                 |
| 2010 | ECDC. <i>AMR surveillance in Europe in 2009</i> (Stockholm: ECDC, 2010).                                                                                                                                                             |
| 2010 | EC. <i>CVO conclusions on AMR</i> (Brussels: Council of European Union, 2010).                                                                                                                                                       |
| 2011 | EC. Action plan against the rising threats from AMR Communication from the Commission to the European Parliament and the Council (Brussels: Council of European Union, 2011).                                                        |
| 2011 | <i>European Parliament resolution of 27 October 2011 on the public health threat of antimicrobial resistance</i> (2013/C131 E/14).                                                                                                   |
| 2011 | <i>European Parliament resolution of 12 May 2011 on antibiotic resistance</i> (P7_TA(2011)0238).                                                                                                                                     |
| 2011 | FAO Codex. <i>Guidelines for risk analysis of foodborne antimicrobial resistance</i> (FAO/ Codes, 2011).                                                                                                                             |
| 2011 | <i>EU US Joint workshop. Challenges and Solutions in the Development of New Diagnostic Tests to Combat Antimicrobial Resistance</i> (2011).                                                                                          |
| 2011 | TATFAR. <i>Transatlantic Taskforce on Antimicrobial Resistance. Recommendations for future collaboration between the US and EU 2011</i> (2011).                                                                                      |
| 2011 | ECDC. <i>AMR surveillance in Europe in 2010</i> (EARS-Net report, 2011).                                                                                                                                                             |
| 2011 | EFSA /ECDC. 'The European Union Summary Report on antimicrobial resistance in zoonotic and indicator bacteria from human, animals and food in the European Union in 2009', <i>EFSA Journal</i> 9:2154 (2011).                        |
| 2011 | EMA. <i>CVMP strategy on antimicrobials 2011-2015</i> (London: EMA, 2011).                                                                                                                                                           |
| 2011 | EMA. <i>Trends in the sales of veterinary antimicrobial agents in nine European countries 2005-2009</i> (first ESVAC report) (London: EMA, 2011).                                                                                    |
| 2011 | WHO Euro Region. <i>Tackling antibiotic resistance from a food safety perspective in Europe</i> (Copenhagen: WHO Regional Office for Europe, 2011).                                                                                  |
| 2011 | Leung, Emily et al. World Health Day, policy package to combat AMR with critical actions by all stakeholders, <i>Bull World Health Organ</i> 89/5 (2011), 390-392.                                                                   |
| 2011 | WHO. <i>Critically Important Antimicrobials for Human Medicine: 2<sup>nd</sup> revision</i> (Geneva: WHO, 2011).                                                                                                                     |
| 2011 | WHO. <i>European Strategic action plan on AMR</i> (Geneva: WHO, 2011).                                                                                                                                                               |
| 2011 | HMA. <i>HMA-V Action plan on antimicrobial issues Updated Version for publication (7 November 2011)</i> (Dublin: HMA, 2011).                                                                                                         |
| 2011 | European Commission. <i>Communication from the Commission to the European Parliament and the Council. Action plan against the rising threats from antimicrobial resistance.</i> COM(2011) 748 (Brussels: European Commission, 2011). |
| 2011 | World Health Organisation (WHO) South-East Asia Region. <i>Jaipur declaration on antimicrobial resistance. WHO Regional Office for South-East Asia: Jaipur, India</i> (WHO SEARO: New Delhi, 2011).                                  |

|      |                                                                                                                                                                                                                                                                                    |
|------|------------------------------------------------------------------------------------------------------------------------------------------------------------------------------------------------------------------------------------------------------------------------------------|
| 2012 | <i>European Parliament resolution of 11 December 2012 on the Microbial Challenge — Rising threats from Antimicrobial Resistance (2012/2041(INI)).</i>                                                                                                                              |
| 2012 | <i>European Parliament Report on the Microbial Challenge – Rising threats from Antimicrobial Resistance (2012).</i>                                                                                                                                                                |
| 2012 | Council of the European Union. <i>Council conclusions of 22 June 2012 on the impact of antimicrobial resistance in the human health sector and in the veterinary sector — a ‘One Health’ perspective.</i>                                                                          |
| 2012 | FAO. <i>Improving biosecurity through prudent and responsible use of veterinary medicines in aquatic food production. Fisheries and aquaculture technical paper (FAO: Rome, 2012).</i>                                                                                             |
| 2012 | OIE. ‘Antimicrobial resistance in animal and public health’, <i>Scientific and Technical Review 31/1 (2012)</i> , 15-21.                                                                                                                                                           |
| 2012 | WHO. <i>The Evolving Threat of Antimicrobial Resistance: Options for Action (Geneva: WHO, 2012).</i>                                                                                                                                                                               |
| 2012 | WHO. <i>Critically Important Antimicrobials for Human Medicine: 3rd revision (Geneva: WHO, 2012).</i>                                                                                                                                                                              |
| 2012 | ECDC. <i>AMR surveillance in Europe in 2011 (EARS-Net report) (Stockholm: ECDC, 2012).</i>                                                                                                                                                                                         |
| 2012 | EFSA /ECDC. ‘The European Union Summary Report on antimicrobial resistance in zoonotic and indicator bacteria from humans, animals and food in 2010’, <i>EFSA Journal 10:2598 (2012).</i>                                                                                          |
| 2012 | EMA. <i>Sales of veterinary antimicrobial agents in 19 EU/EEA countries in 2010 (second ESVAC report) (London: EMA, 2012).</i>                                                                                                                                                     |
| 2013 | European Commission. <i>Antimicrobial Resistance, Special Eurobarometer 407 Report (Brussels: European Commission, 2013).</i>                                                                                                                                                      |
| 2013 | EFSA/ECDC. ‘The European Union Summary Report on antimicrobial resistance in zoonotic and indicator bacteria from humans, animals and food in 2011’, <i>EFSA Journal 11/5 (2013)</i> , 3196.                                                                                       |
| 2013 | ECDC. <i>AMR surveillance in Europe in 2012 (EARS-Net report) (Stockholm: ECDC, 2013).</i>                                                                                                                                                                                         |
| 2013 | ECDC. <i>Surveillance of antimicrobial consumption in Europe in 2010 (ESAC report) (Stockholm: ECDC, 2013).</i>                                                                                                                                                                    |
| 2013 | EMA. <i>Sales of veterinary antimicrobial agents in 25 EU/EEA countries in 2011 (ESVAC report) (London: EMA, 2013).</i>                                                                                                                                                            |
| 2013 | FAO. Addressing antimicrobial resistance, <i>FAO Highlights</i> , July 2013.                                                                                                                                                                                                       |
| 2014 | <i>67th World Health Assembly resolution WHA67.25 for global action plan in May 2014.</i>                                                                                                                                                                                          |
| 2014 | APEC. <i>APEC Guideline to Tackle Antimicrobial Resistance in the Asia-Pacific Region, APEC (Seoul: APEC, 2014).</i>                                                                                                                                                               |
| 2014 | Council of the European Union. ‘Council conclusions of 1 December 2014 on patient safety and quality of care, including the prevention and control of healthcare associated infections and antimicrobial resistance’, <i>Official Journal of the European Union C438/7 (2014).</i> |
| 2014 | TATFAR. <i>TATFAR : Progress report Recommendations for future collaboration between the US and EU (2014).</i>                                                                                                                                                                     |

|      |                                                                                                                                                                                                                                                                                                                            |
|------|----------------------------------------------------------------------------------------------------------------------------------------------------------------------------------------------------------------------------------------------------------------------------------------------------------------------------|
| 2014 | EMA. <i>Answers to the requests for scientific advice on the impact on public health and animal health of the use of antibiotics in animals</i> (London: EMA, 2014).                                                                                                                                                       |
| 2014 | EIP-AGRI Focus Group <i>Reducing antibiotic use in pig farming</i> (European Commission, 2014).                                                                                                                                                                                                                            |
| 2014 | ECDC. <i>AMR surveillance in Europe in 2013 (EARS-Net report)</i> (Stockholm: ECDC, 2014).                                                                                                                                                                                                                                 |
| 2014 | ECDC. <i>Surveillance of antimicrobial consumption in Europe in 2012 (ESAC report)</i> (Stockholm: ECDC, 2014).                                                                                                                                                                                                            |
| 2014 | ECDC. <i>Surveillance of antimicrobial consumption in Europe in 2011 (ESAC report)</i> (Stockholm: ECDC, 2014).                                                                                                                                                                                                            |
| 2014 | EMA. <i>Sales of veterinary antimicrobial agents in 26 EU/EEA countries in 2012 (ESVAC report)</i> (London: EMA, 2014).                                                                                                                                                                                                    |
| 2014 | WHO. <i>Antimicrobial resistance: global report on surveillance</i> (Geneva: WHO, 2014).                                                                                                                                                                                                                                   |
| 2014 | WHO. <i>Briefing Note Antimicrobial Resistance: An Emerging Water, Sanitation and Hygiene Issue</i> (Geneva: WHO, 2014).                                                                                                                                                                                                   |
| 2014 | FAO. <i>Review of the Literature on Antimicrobial Resistance in Zoonotic Bacteria from Livestock in East, South and Southeast Asia</i> (Rome: FAO, 2014).                                                                                                                                                                  |
| 2015 | TATFAR. <i>Report on the modified Delphi process for common structure and process indicators for hospital antimicrobial stewardship programs</i> (2015).                                                                                                                                                                   |
| 2015 | G7. <i>Declaration of the G7 Health Ministers Berlin Declaration on Antimicrobial Resistance Global Union for Antibiotics Research and Development (GUARD) – 8 - 9 October 2015 in Berlin</i> (Berlin, 2015).                                                                                                              |
| 2015 | G7. <i>Leaders' Declaration G7 Summit 7-8 June 2015</i> . G7 Germany, Elmau (Elmau, 2015).                                                                                                                                                                                                                                 |
| 2015 | <i>European Parliament Resolution of 19 May 2015 on safer healthcare in Europe: improving patient safety and fighting antimicrobial resistance</i> (P8_TA(2015)0197).                                                                                                                                                      |
| 2015 | EC. 'Guidelines for the prudent use of antimicrobials in veterinary medicine', <i>Official Journal of the European Union</i> C 299/04 (2015).                                                                                                                                                                              |
| 2015 | EC. <i>Progress report on the action plan against the rising threats from AMR</i> (SWD (2015) 59) (Brussels: European Commission, 2015).                                                                                                                                                                                   |
| 2015 | ECDC. <i>Annual epidemiological report 2014. Antimicrobial resistance and healthcare-associated infections [2012 data]</i> (Stockholm: ECDC, 2015).                                                                                                                                                                        |
| 2015 | ECDC. <i>AMR surveillance in Europe in 2014 (EARS-Net report)</i> (Stockholm: ECDC, 2015).                                                                                                                                                                                                                                 |
| 2015 | EMA. <i>Sales of veterinary antimicrobial agents in 26 EU/EEA countries in 2013 Fifth ESVAC report</i> (London: EMA, 2015).                                                                                                                                                                                                |
| 2015 | ECDC/EFSA/EMA. 'First joint report on the integrated analysis of the consumption of antimicrobial agents and occurrence of antimicrobial resistance in bacteria from humans and food-producing animals', <i>EFSA Journal</i> 13/114 (2015) (Joint Interagency Antimicrobial Consumption and Resistance Analysis (JIACRA)). |
| 2015 | OECD. <i>Policy brief AMR in G7 countries</i> (Paris: OECD, 2015).                                                                                                                                                                                                                                                         |

|      |                                                                                                                                                                                                                                                            |
|------|------------------------------------------------------------------------------------------------------------------------------------------------------------------------------------------------------------------------------------------------------------|
| 2015 | OECD. <i>Antimicrobial Resistance in G7 Countries And Beyond: Economic Issues, Policies and Options for Action</i> (Paris: OECD, 2015).                                                                                                                    |
| 2015 | WHO. <i>Global Action Plan on Antimicrobial Resistance</i> (Geneva: WHO, 2015) (developed together with FAO and OIE).                                                                                                                                      |
| 2015 | WHO. <i>Worldwide country situation analysis: response to antimicrobial resistance</i> (Geneva: WHO, 2015).                                                                                                                                                |
| 2015 | WHO. <i>Antibiotic Resistance. A multi-country public awareness survey</i> (Geneva: WHO, 2015).                                                                                                                                                            |
| 2015 | WHO. <i>Global Antimicrobial Resistance Surveillance System: Manual for Early Implementation</i> (Geneva: WHO, 2015).                                                                                                                                      |
| 2015 | FAO. <i>Codex texts on foodborne antimicrobial resistance</i> (Rome: FAO, 2015).                                                                                                                                                                           |
| 2015 | FAO. <i>Status Report on Antimicrobial Resistance</i> (Rome: FAO, 2015).                                                                                                                                                                                   |
| 2015 | FAO. 'FAO's work on antimicrobial resistance', <i>Information Note no. 4 CL 153/3 Adjustments to the Programme of Work and Budget 2016-2017</i> . (Rome: FAO, 2015).                                                                                       |
| 2016 | WHO. <i>Critically Important Antimicrobials for Human Medicine: 4th Revision</i> (Geneva: WHO, 2016).                                                                                                                                                      |
| 2016 | UN. <i>Political Declaration of the UN General Assembly on Antimicrobial Resistance (71st United Nations General Assembly Resolution 70/183) to hold high-level meeting on AMR</i> (New York: UN, 2016).                                                   |
| 2016 | Council of the European Union. 'Council conclusions on the next steps under a One Health approach to combat antimicrobial resistance', <i>Official Journal of the European Union C 259/26</i> (2016).                                                      |
| 2016 | EMA /EFSA. 'Joint Scientific Opinion on measures to reduce the need to use antimicrobial agents in animal husbandry in the European Union, and the resulting impacts on food safety (RONAFA) – adopted 01.12.2016', <i>EFSA Journal 15/1</i> (2017), 4666. |
| 2016 | EFSA/ECDC. 'The European Union summary report on antimicrobial resistance in zoonotic and indicator bacteria from humans, animals and food in 2014', <i>EFSA Journal 14/2</i> (2016), 4380.                                                                |
| 2016 | ECDC. <i>AMR surveillance in Europe in 2015</i> (Stockholm: ECDC, 2016).                                                                                                                                                                                   |
| 2016 | EC. 'Council conclusions on the next steps under a One Health approach to combat antimicrobial resistance', <i>Official Journal of the European Union, C269/05</i> , 23.07.2016.                                                                           |
| 2016 | Smith, Elta et al., <i>Evaluation of the EC Action Plan against the rising threats from antimicrobial resistance</i> (Brussels: European Commission, 2016).                                                                                                |
| 2016 | EC. <i>Action Plan Against the rising threats from Antimicrobial Resistance: Road Map</i> (Brussels: European Commission, 2016).                                                                                                                           |
| 2016 | EMA. <i>CVMP strategy on antimicrobials 2016-2020</i> (London: EMA, 2016).                                                                                                                                                                                 |
| 2016 | EMA. <i>Sales of veterinary antimicrobial agents in 29 EU/EEA countries in 2014 (ESVAC report). Trends from 2011 to 2014</i> (London: EMA, 2016).                                                                                                          |
| 2016 | WHO. <i>National antimicrobial resistance surveillance systems and participation in the Global Antimicrobial Resistance Surveillance System (GLASS) A guide to planning, implementation, and monitoring and evaluation</i> (Geneva: WHO, 2016).            |
| 2016 | WHO FAO OIE. <i>A manual for developing national action plans</i> (2016).                                                                                                                                                                                  |

|      |                                                                                                                                                                                                                                                   |
|------|---------------------------------------------------------------------------------------------------------------------------------------------------------------------------------------------------------------------------------------------------|
| 2016 | FAO. <i>Drivers and Dynamics and Epidemiology of Antimicrobial Resistance in Animal Production</i> (Rome: FAO, 2016).                                                                                                                             |
| 2016 | FAO. <i>Antimicrobial resistance and our food systems: challenges and solutions</i> (Rome: FAO, 2016).                                                                                                                                            |
| 2016 | FAO. <i>Antimicrobial resistance. What is it</i> (Rome: FAO, 2016).                                                                                                                                                                               |
| 2016 | FAO. <i>Antimicrobial resistance. Global commitment to local action</i> (Rome: FAO, 2016).                                                                                                                                                        |
| 2016 | FAO. <i>Update on FAOs work on AMR</i> (Rome: FAO, 2016).                                                                                                                                                                                         |
| 2016 | FAO. <i>The FAO action plan on antimicrobial resistance 2016-2020</i> (Rome: FAO, 2016).                                                                                                                                                          |
| 2016 | OIE. <i>OIE Annual report on the use of antimicrobial agents in animals - Better understanding of the global situation</i> (Paris: OIE, 2016).                                                                                                    |
| 2016 | OIE. <i>Combating Antimicrobial Resistance Through A One Health Approach: Actions and OIE Strategy</i> (Paris: OIE, 2016).                                                                                                                        |
| 2016 | OIE. <i>The OIE Strategy on Antimicrobial Resistance and the Prudent Use of Antimicrobials</i> (Paris: OIE, 2016).                                                                                                                                |
| 2016 | <i>Tackling Drug-Resistant Infections Globally: Final Report and Recommendations</i> (London: AMR Review, 2016)                                                                                                                                   |
| 2016 | OECD. <i>Antimicrobial Resistance: Policy Insights</i> (Paris: OECD, 2016).                                                                                                                                                                       |
| 2016 | TATFAR. <i>Economic incentives for antimicrobial therapy development: summary from the TATFAR</i> (2016).                                                                                                                                         |
| 2017 | ICF. 'EU external scientific report Perceptions on the human health impact of antimicrobial resistance (AMR) and antibiotics use in animals across the EU', <i>EFSA supporting publication</i> (2017), EN-1183.                                   |
| 2017 | TATFAR. 'Pull Incentives for Antibacterial Drug Development: An Analysis by the Transatlantic Task Force on Antimicrobial Resistance', <i>Clinical Infectious Diseases</i> 65/8 (2017), 1378-1382.                                                |
| 2017 | G20. <i>Germany Hamburg G20 Leaders' Declaration: Shaping an interconnected world</i> (Hamburg, 2017).                                                                                                                                            |
| 2017 | G20. <i>Berlin Declaration of the G20 Health Ministers: Together Today for a Healthy Tomorrow</i> (Berlin, 2017).                                                                                                                                 |
| 2017 | EMA/EFSA. 'EMA and EFSA Joint Scientific Opinion on measures to reduce the need to use antimicrobial agents in animal husbandry in the European Union, and the resulting impacts on food safety (RONAFA)', <i>EFSA Journal</i> 15/1 (2017), 4666. |
| 2017 | EC. <i>A European One Health Action Plan against Antimicrobial Resistance (AMR)</i> (Brussels: EC, 2017).                                                                                                                                         |
| 2017 | EC. <i>Antimicrobial resistance and causes of non-prudent use of antibiotics in human medicine in the EU</i> (Brussels: EU, 2017).                                                                                                                |
| 2017 | ECDC. <i>AMR surveillance in Europe in 2016</i> (Stockholm: ECDC, 2017).                                                                                                                                                                          |
| 2017 | ECDC. <i>EU Guidelines for the prudent use of antimicrobials in human health</i> (Stockholm: ECDC, 2017).                                                                                                                                         |
| 2017 | ECDC, EFSA and EMA. 'Joint Scientific Opinion on a list of outcome indicators as regards surveillance of antimicrobial resistance and antimicrobial consumption in humans and food-producing animals', <i>EFSA Journal</i> 15/10 (2017), 5017.    |



|      |                                                                                                                                                                                                                                                             |
|------|-------------------------------------------------------------------------------------------------------------------------------------------------------------------------------------------------------------------------------------------------------------|
| 2017 | ECDC/EFSa/EMA. 'Second joint report on the integrated analysis of the consumption of antimicrobial agents and occurrence of antimicrobial resistance in bacteria from humans and food-producing animals (JIACRA 2)', <i>EFSA Journal</i> 15/7 (2017), 4872. |
| 2017 | ECDC/EFSa. 'The European Union summary report on antimicrobial resistance in zoonotic and indicator bacteria from humans, animals and food in 2015', <i>EFSA Journal</i> 15/2 (2017), 4694.                                                                 |
| 2017 | World Bank. <i>Assessing the Global economic and poverty effects of antimicrobial resistance</i> [Policy Research Working Paper; No. 8133] (Washington DC: World Bank, 2017).                                                                               |
| 2017 | World Bank. <i>Drug Resistant Infections: A Threat to our Economic Future</i> (Washington DC: World Bank, 2017).                                                                                                                                            |
| 2017 | EMA. <i>Sales of veterinary antimicrobial agents in 30 EU/EEA countries in 2015 (ESVAC report). Trends from 2010 to 2015</i> (London: EMA, 2017).                                                                                                           |
| 2017 | WHO. <i>Guidelines for the prevention and control of carbapenem-resistant Enterobacteriaceae, Acinetobacter baumannii and Pseudomonas aeruginosa in health care facilities</i> (Geneva: World Health Organization, 2017).                                   |
| 2017 | WHO. <i>Prioritization of pathogens to guide discovery, research and development of new antibiotics for drug-resistant bacterial infections, including tuberculosis</i> (Geneva: World Health Organization, 2017).                                          |
| 2017 | WHO. <i>Integrated Surveillance of Antimicrobial Resistance in Foodborne Bacteria: Application of a One Health Approach</i> (Geneva: World Health Organization, 2017).                                                                                      |
| 2017 | WHO. <i>Critically important antimicrobials for human medicine – 5th rev.</i> (Geneva: World Health Organization, 2017).                                                                                                                                    |
| 2017 | WHO. <i>Global Priority List of Antibiotic-Resistant Bacteria To Guide Research, Discovery and Development of new Antibiotics</i> (Geneva: WHO, 2017).                                                                                                      |
| 2017 | WHO. <i>Antibacterial agents in clinical development – an analysis of the antibacterial clinical development pipeline, including Mycobacterium tuberculosis</i> (Geneva: WHO, 2017).                                                                        |
| 2017 | ECA/FAO. <i>Antimicrobial resistance (AMR): the loss of a major defence to the emerging challenge? 40th Session. Budapest, Hungary. 27-28 September 2017</i> (Rome: ECA/FAO, 2017)                                                                          |
| 2017 | FAO. <i>Antimicrobial resistance in food and agriculture</i> (Rome: FAO, 2017).                                                                                                                                                                             |
| 2017 | FAO. <i>Antimicrobial resistance a serious threat to human and animal health.</i> Available at <a href="http://www.fao.org/3/i6370e/i6370e.pdf">http://www.fao.org/3/i6370e/i6370e.pdf</a> (Rome: FAO, 2017).                                               |
| 2017 | FAO. <i>FAO initiatives on prevention and control of AMR.</i> Available at <a href="http://www.fao.org/3/i7118e/i7118e.pdf">http://www.fao.org/3/i7118e/i7118e.pdf</a> (Rome: FAO, 2017).                                                                   |
| 2017 | FAO, WHO, OIE. <i>Country Progress in the implementation of the global action plan on antimicrobial resistance: WHO, FAO and OIE Launch Global Tripartite Database</i> (2017).                                                                              |
| 2017 | FAO, WHO, OIE. <i>Monitoring and evaluation of the Global Action Plan on Antimicrobial Resistance: Proposed approach, August 2017</i>                                                                                                                       |
| 2017 | OECD, WHO, FAO, OIE. <i>Tackling Antimicrobial Resistance. Ensuring Sustainable R&amp;D</i> (2017)                                                                                                                                                          |

|      |                                                                                                                                                                                                                                                                                     |
|------|-------------------------------------------------------------------------------------------------------------------------------------------------------------------------------------------------------------------------------------------------------------------------------------|
| 2017 | OECD. 'Low-value health care with high stakes: Promoting the rational use of antimicrobials', in <i>Tackling Wasteful Spending on Health</i> (Paris: OECD, 2019).                                                                                                                   |
| 2018 | FAO, WHO, OIE. <i>Memorandum of understanding between FAO, OIE, and WHO</i> . (2018).                                                                                                                                                                                               |
| 2018 | EC. <i>Measures to Tackle Antimicrobial Resistance Through the Prudent Use of Antimicrobials in Animals</i> (Luxembourg: EU, 2018).                                                                                                                                                 |
| 2018 | EC. <i>Non-EU Countries' National Policies and Measures on Antimicrobial Resistance</i> (Luxembourg: EU, 2018).                                                                                                                                                                     |
| 2018 | EFSA/ECDC. 'The European Union Summary Report on antimicrobial resistance in zoonotic and indicator bacteria from humans, animals and food in 2016', <i>EFSA Journal</i> 16/2 (2018), 5182.                                                                                         |
| 2018 | OECD. <i>Stemming the Superbug Tide, Just A Few Dollars More</i> (Paris: OECD, 2018).                                                                                                                                                                                               |
| 2018 | European Parliament. <i>Report on a European One Health Action Plan against Antimicrobial Resistance</i> . Available at <a href="https://www.europarl.europa.eu/doceo/document/A-8-2018-0257_EN.pdf">https://www.europarl.europa.eu/doceo/document/A-8-2018-0257_EN.pdf</a> (2018). |
| 2018 | ECDC. <i>Annual Epidemiological Report for 2014 Antimicrobial consumption</i> (Stockholm: ECDC, 2018).                                                                                                                                                                              |
| 2018 | ECDC. <i>Annual Epidemiological Report for 2015 Antimicrobial consumption</i> (Stockholm: ECDC, 2018).                                                                                                                                                                              |
| 2018 | ECDC. <i>Annual Epidemiological Report for 2016 Antimicrobial consumption</i> (Stockholm: ECDC, 2018).                                                                                                                                                                              |
| 2018 | ECDC. <i>AMR surveillance in Europe in 2017</i> (Stockholm: ECDC, 2018).                                                                                                                                                                                                            |
| 2018 | ECDC. <i>Annual Epidemiological Report for 2017 Antimicrobial consumption</i> (Stockholm: ECDC, 2018)                                                                                                                                                                               |
| 2018 | ECDC. <i>Surveillance of antimicrobial consumption in Europe in 2013-2014</i> (Stockholm: ECDC, 2018)                                                                                                                                                                               |
| 2018 | EMA. <i>Sales of veterinary antimicrobial agents in 30 EU/EEA countries in 2016 (ESVAC report). Trends from 2010 to 2016</i> (London: EMA, 2018).                                                                                                                                   |
| 2018 | WHO, FAO, OIE. <i>Monitoring Global Progress On Addressing Antimicrobial Resistance. Analysis report of the second round of results of AMR country-self-assessment survey</i> (Geneva: WHO, 2018).                                                                                  |
| 2018 | WHO. <i>WHO report on surveillance of antibiotic consumption: 2016-2018 early implementation</i> (Geneva: World Health Organization, 2018).                                                                                                                                         |
| 2018 | WHO. <i>Global antimicrobial resistance surveillance system (GLASS) report: early implementation 2016-2017</i> (Geneva: WHO, 2018).                                                                                                                                                 |
| 2018 | WHO. <i>Critically Important Antimicrobials for Human Medicine: 6<sup>th</sup> revision</i> (Geneva: WHO, 2018).                                                                                                                                                                    |
| 2018 | WHO. <i>Update of antibacterial agents in clinical development</i> (Geneva: WHO, 2018).                                                                                                                                                                                             |
| 2018 | WHO. <i>Tackling Antimicrobial Resistance (AMR) together. Working Paper 5.0: Enhancing the focus on gender and equity</i> (Geneva: WHO, 2018).                                                                                                                                      |
| 2018 | WHO. <i>Tackling Antimicrobial Resistance (AMR) together. Working Paper 1.0: Multisectorial coordination</i> (Geneva: WHO, 2018).                                                                                                                                                   |

|      |                                                                                                                                                                                                                                                       |
|------|-------------------------------------------------------------------------------------------------------------------------------------------------------------------------------------------------------------------------------------------------------|
| 2018 | FAO. <i>FAO initiatives on prevention and control of antimicrobial resistance: Addressing antimicrobial usage in Asia's livestock production industry</i> (Rome: FAO, 2018).                                                                          |
| 2018 | FAO. <i>FAO Information Pack Supporting national efforts to minimise risks from Antimicrobial Resistance (AMR)</i> (Rome: FAO, 2018).                                                                                                                 |
| 2018 | FAO/RAP. <i>Antimicrobial resistance policy review and development framework</i> (Bangkok: FAO/RAP, 2018).                                                                                                                                            |
| 2018 | Welcome, US CDC, UK Science and Innovation Network. <i>Initiatives for Addressing Antimicrobial Resistance in the Environment</i> (2018).                                                                                                             |
| 2018 | OIE. <i>Annual Report on antimicrobial agents intending for use in animals – Better Understanding the situation (Third Edition)</i> (Paris: OIE, 2018).                                                                                               |
| 2019 | D'Atri et al (TATFAR). 'Targets for the reduction of antibiotic use in humans in the Transatlantic Taskforce on Antimicrobial Resistance (TATFAR) partner countries', <i>Eurosurveillance</i> 24/28 (2019).                                           |
| 2019 | TATFAR. <i>Data for Action: Using Available Data Sources to Track Antibiotic Use in your Country</i> (2019).                                                                                                                                          |
| 2019 | UNICEF. <i>Time is running out Technical note on antimicrobial resistance</i> (New York: UNICEF, 2019)                                                                                                                                                |
| 2019 | IACG. <i>No Time to wait: securing the future from drug-resistant infections</i> (UN, 2019).                                                                                                                                                          |
| 2019 | WHO/ European Observatory on Health Systems and Policies. <i>Averting the AMR crisis. Policy Brief 32. What are the avenues for policy action for countries in Europe?</i> (Copenhagen: WHO Regional Office for Europe, 2019).                        |
| 2019 | WHO. <i>Antibacterial agents in preclinical development: an open access database</i> (Geneva: WHO, 2019).                                                                                                                                             |
| 2019 | FAO and WHO. <i>Joint FAO/WHO Expert Meeting in collaboration with OIE on Foodborne Antimicrobial Resistance: Role of the Environment, Crops and Biocides – Meeting report. Microbiological Risk Assessment Series no. 34.</i> (Rome: FAO/WHO, 2019). |
| 2019 | WHO. <i>Antibacterial agents in clinical development: an analysis of the antibacterial clinical development pipeline</i> (Geneva: WHO, 2019).                                                                                                         |
| 2019 | WHO. <i>Antimicrobial stewardship programmes in health-care facilities in low- and middle-income countries. A practical toolkit</i> (Geneva: WHO, 2019).                                                                                              |
| 2019 | WHO. <i>Meeting Report Antibiotic Shortages: Magnitude, Causes and Possible Solutions. Norwegian Directorate of Health, Oslo, Norway 10-11 December 2018</i> (Geneva: WHO, 2019).                                                                     |
| 2019 | WHO. <i>Meeting report for technical consultation on in vitro diagnostics for AMR, 27–28 March 2019</i> (Geneva: WHO, 2019).                                                                                                                          |
| 2019 | WHO. <i>Landscape of diagnostics against antibacterial resistance, gaps and priorities</i> (Geneva: WHO, 2019).                                                                                                                                       |
| 2019 | WHO, FAO, OIE. <i>Monitoring and Evaluation of the Global Action Plan on Antimicrobial Resistance Framework and recommended indicators</i> (2019).                                                                                                    |
| 2019 | WHO. <i>Turning plans into action for antimicrobial resistance (AMR). Working paper 2.0: implementation and coordination</i> (Geneva: WHO, 2019).                                                                                                     |
| 2019 | FAO. <i>Stakeholder Consultation on an FAO Database for Antimicrobial Resistance (AMR) in Food and Agriculture</i> (Rome: FAO, 2019).                                                                                                                 |

|      |                                                                                                                                                                                                                                                                               |
|------|-------------------------------------------------------------------------------------------------------------------------------------------------------------------------------------------------------------------------------------------------------------------------------|
| 2019 | FAO. <i>Monitoring and surveillance of antimicrobial resistance in bacteria from healthy food animals intended for consumption</i> [Vol. 1] (Bangkok: FAO, 2019).                                                                                                             |
| 2019 | OIE. <i>Report of the meeting of the OIE working group on Antimicrobial Resistance. Paris, October 1-3, 2019</i> (Paris: OIE, 2019).                                                                                                                                          |
| 2019 | World Bank. <i>Pulling Together to Beat Superbugs: Knowledge and Implementation Gaps in Addressing Antimicrobial Resistance</i> (Washington DC: World Bank, 2019).                                                                                                            |
| 2019 | FAO. <i>Antimicrobial Resistance (Draft Resolution) - C 2019/LIM/22</i> (2019).                                                                                                                                                                                               |
| 2019 | FAO and Ministry of Food and Environment of Denmark. <i>Tackling Antimicrobial Use and Resistance in Pig Production. Lessons Learned in Denmark</i> (Rome: FAO, 2019).                                                                                                        |
| 2019 | FAO RAP. <i>Managing antimicrobial resistance in Thailand</i> (2019).                                                                                                                                                                                                         |
| 2019 | FAO, WHO, OIE. <i>Antimicrobial Resistance Multi-Partner Trust Fund</i> (2019).                                                                                                                                                                                               |
| 2019 | EMA. <i>Sales of veterinary antimicrobial agents in 31 European countries in 2017 Trends from 2010 to 2017</i> (Amsterdam: EMA, 2019).                                                                                                                                        |
| 2019 | ECDC. <i>Antimicrobial consumption in the EU/EEA Annual epidemiological report for 2018</i> (Stockholm: ECDC, 2019).                                                                                                                                                          |
| 2019 | ECDC. <i>AMR surveillance in Europe in 2018</i> (Stockholm: ECDC, 2019).                                                                                                                                                                                                      |
| 2019 | ECDC and OECD. <i>Antimicrobial Resistance Tackling the Burden in the European Union</i> (2019).                                                                                                                                                                              |
| 2020 | WHO. <i>GLASS whole-genome sequencing for surveillance of antimicrobial resistance</i> (Geneva: WHO, 2020).                                                                                                                                                                   |
| 2020 | WHO. <i>GLASS guidance for national reference laboratories</i> (Geneva: WHO, 2020).                                                                                                                                                                                           |
| 2020 | WHO. <i>First meeting of the WHO Antifungal Expert Group on Identifying Priority Fungal Pathogens: meeting report</i> (Geneva: WHO, 2020).                                                                                                                                    |
| 2020 | WHO. <i>A financial model for an impact investment fund for the development of antibacterial treatments and diagnostics: a user guide</i> (Geneva: WHO, 2020.)                                                                                                                |
| 2020 | WHO. <i>GLASS method for estimating attributable mortality of antimicrobial resistant bloodstream infections</i> (Geneva: WHO, 2020).                                                                                                                                         |
| 2020 | WHO. <i>Global antimicrobial resistance surveillance system (GLASS) report: early implementation 2020</i> (Geneva: WHO, 2020).                                                                                                                                                |
| 2020 | WHO. <i>Target product profiles for needed antibacterial agents: enteric fever, gonorrhoea, neonatal sepsis, urinary tract infections and meeting report</i> (Geneva: WHO, 2020).                                                                                             |
| 2020 | WHO. <i>Target product profiles for antibacterial resistance diagnostics. Geneva: World Health Organization</i> (Geneva: WHO, 2020).                                                                                                                                          |
| 2020 | WHO, FAO, OIE. <i>Technical brief on water, sanitation, hygiene and wastewater management to prevent infections and reduce the spread of antimicrobial resistance</i> (WHO/FAO/OIE 2020).                                                                                     |
| 2020 | FAO, OIE, WHO. <i>International instruments on the use of antimicrobials across the human, animal and plant sectors</i> (2020).                                                                                                                                               |
| 2020 | Bondad-Reataso et al. [FAO], 'Outputs and Activities of FAO Project FMM/RAS/298/MULON Antimicrobial Resistance in Fisheries and Summary of FAO's Recent Work on Antimicrobial Resistance in Aquaculture', <i>FAO Fisheries and Aquaculture Circular No. 1215</i> . Rome, FAO. |

|      |                                                                                                                                                                                                                |
|------|----------------------------------------------------------------------------------------------------------------------------------------------------------------------------------------------------------------|
| 2020 | FAO. <i>FAO Expert Working Group Meeting 'Scoping Exercise To Increase The Understanding Of Risks of Antimicrobial Resistance (AMR) in Aquaculture'</i> [held in Palermo, Italy, 2018] (2020)                  |
| 2020 | FAO <i>Antimicrobial resistance in food</i> . Available at <a href="http://www.fao.org/3/ca8275en/CA8275EN.pdf">http://www.fao.org/3/ca8275en/CA8275EN.pdf</a> (March 2020).                                   |
| 2020 | FAO. <i>Progress report on the implementation of FAO Action Plan on Antimicrobial Resistance (AMR) 2016-2020, and the proposal for a new FAO Action Plan on AMR 2021-2025</i> [COAG/2020/8] (Rome: FAO, 2020). |
| 2020 | FAO/APRC. <i>Regional conference for Asia and the Pacific. Report on Antimicrobial Resistance (AMR): Bhutan 17-20 February</i> (Bangkok: FAO/APRC, 2020).                                                      |
| 2020 | FAO. <i>Antimicrobial Resistance (AMR) in relation to pesticide use in plant production</i> (2020).                                                                                                            |
| 2020 | FAO. 'Improving communications for antimicrobial resistance (AMR) in Africa: How should we move forward?' <i>FSN Forum in Africa</i> – summary of online discussion no. 16 (2020).                             |
| 2020 | FAO. <i>Tackling Antimicrobial Use And Resistance in Dairy Cattle. Lessons Learned in Sweden</i> (Rome: FAO, 2020)                                                                                             |
| 2020 | OIE. <i>Annual report on antimicrobials intended for use in animals. Better understanding of the global situation</i> (Paris: OIE, 2020).                                                                      |
| 2020 | OIE. <i>Report of the Meeting of the OIE Working Group on Antimicrobial Resistance April 2020</i> (Paris: OIE, 2020).                                                                                          |
| 2020 | OIE. <i>Report of the meeting of the OIE working group on Antimicrobial Resistance. Paris (via zoom), October 13-15, 2020</i> (Paris: OIE, 2020).                                                              |
| 2020 | EU. <i>Progress Report 2017 EU AMR Action Plan</i> (update for Q2 2019) (2020).                                                                                                                                |
| 2020 | ECDC. <i>Antimicrobial consumption in the EU/EEA Annual epidemiological report for 2019</i> (Stockholm: ECDC, 2020).                                                                                           |
| 2020 | ECDC. <i>Antimicrobial resistance in the EU/EEA (EARS-Net) Annual Epidemiological Report for 2019</i> (Stockholm: ECDC, 2020).                                                                                 |
| 2020 | EMA. <i>Sales of veterinary antimicrobial agents in 31 European countries in 2018 Trends from 2010 to 2018</i> (Amsterdam: EMA, 2020).                                                                         |
